# Supplementary material for: Omicron variant BA.1, BA.5, BQ.1.1, and XBB.1.5 Neutralizing Antibodies Following BNT162b2 BA.4/5 versus mRNA-1273 BA.1 Bivalent Vaccination
Source: Research Square preprint supplement (doi:10.21203/rs.3.rs-2846541/v1), 2023-05-05
Supplement: Supplementary file 1 [file 01d99072e715644bf3020a20.docx]

**
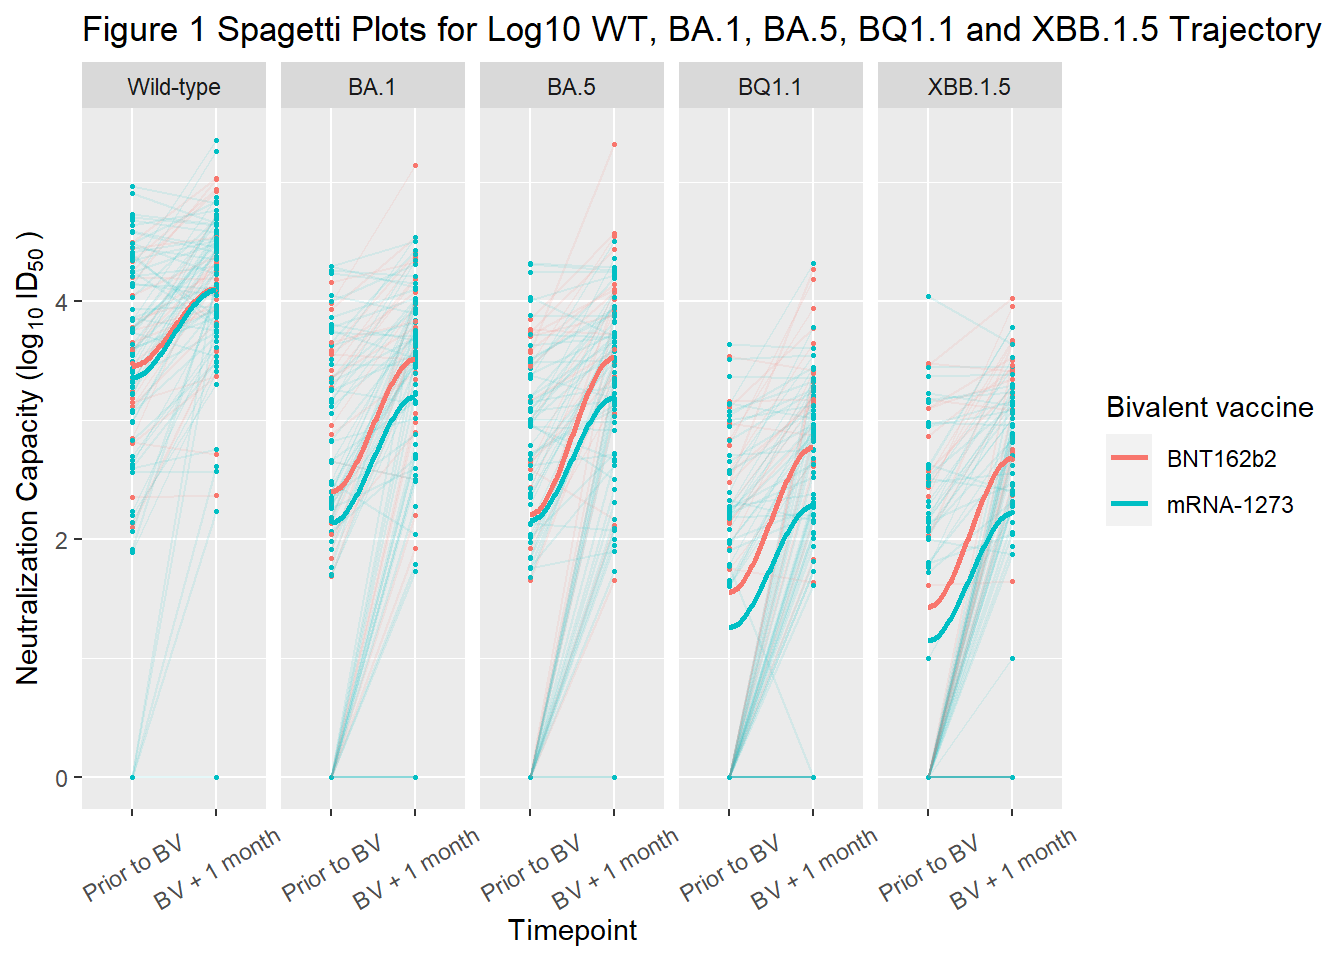
**

**Extended Data Fig 1 | Neutralizing antibody trajectories for wild-type, BA.1, BA.5, BQ.1.1, and XBB.1.5 subvariants prior to and one month following bivalent vaccination with or BNT162b2 BA.4/5 (n=26) or mRNA-1273 BA.1 (n=72).** Differences by vaccine type were not statistically different by vaccine type after adjustment for baseline neutralizing antibody levels, anti-nucleocapsid positivity, patient type, and number of vaccine doses: wild-type (P=0.48), BA.1 (P=0.21), BA.5 (P=0.069), BQ.1.1 (P=0.10), nor XBB.1.5 (P=0.099). Dots represent individual serum samples collected (n=98 for each time point).


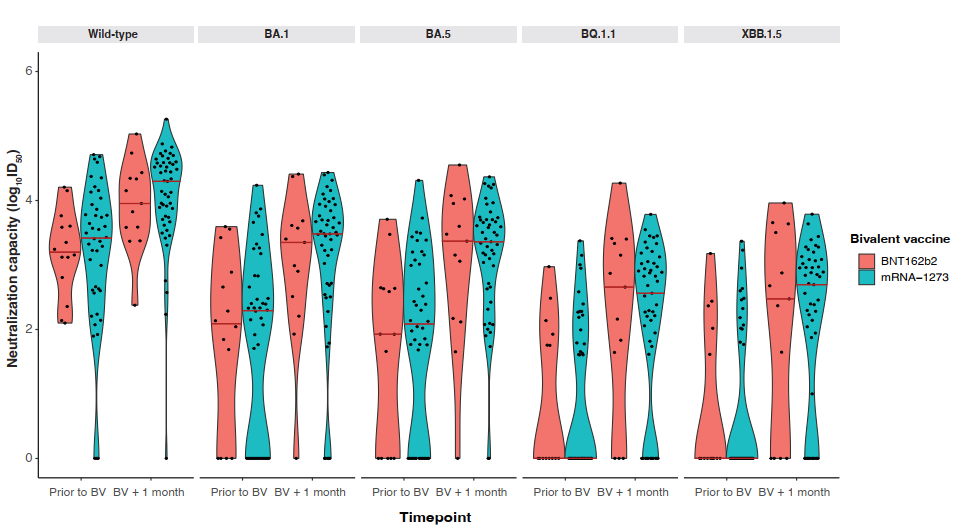
**Extended Data Fig 2 | Neutralizing antibodies against wild-type, BA.1, BA.5, BQ.1.1, and XBB.1.5 by bivalent vaccine type: BNT162b2 BA.4/5 (n=14) versus mRNA-1273 (n=44) after exclusion of participants with a positive anti-nucleocapsid antibody.** Solid red line indicates median level. Dots represent individual serum samples collected (n=58).


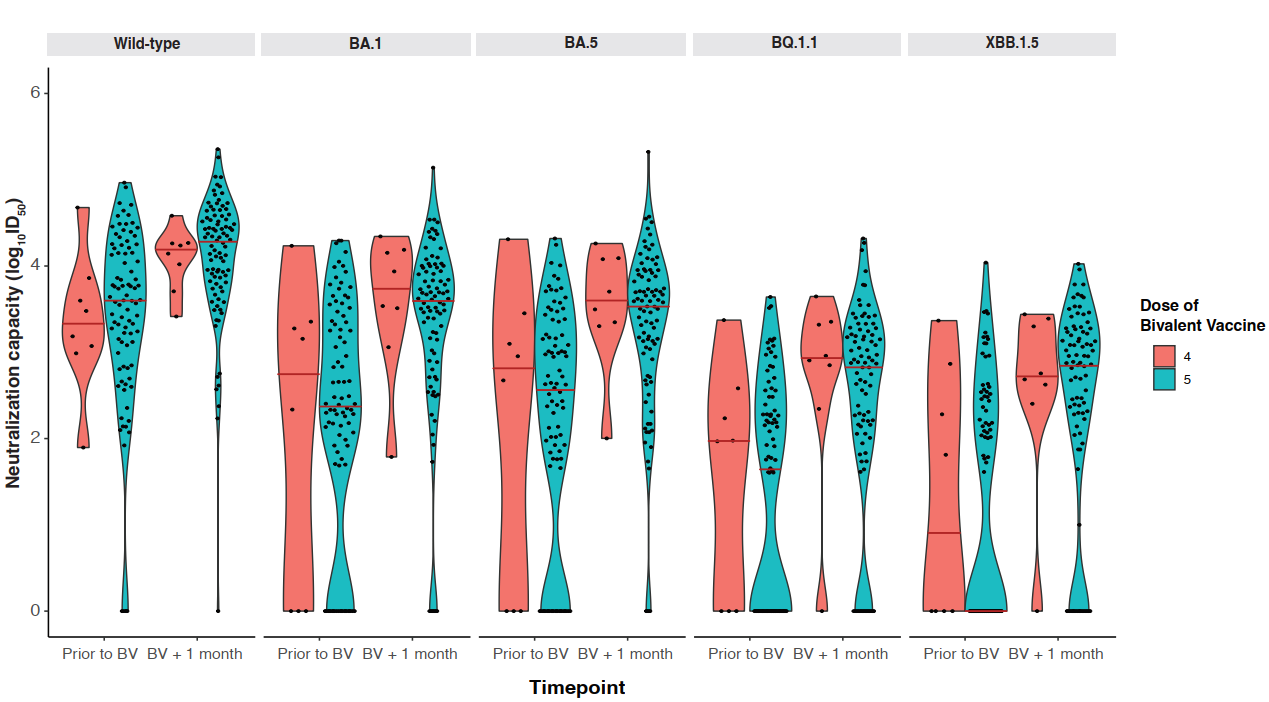


# **Extended Data Fig 3 | Difference in neutralizing antibodies against wild-type, BA.1, BA.5, BQ.1.1 by total number of COVID-19 vaccine doses.** There was no significant difference in neutralizing antibodies against any subvariant in those receiving 4 (n=8) versus 5 doses (n=90). Solid red line indicates median level. Dots represent individual serum samples collected (n=98 for each timepoint).


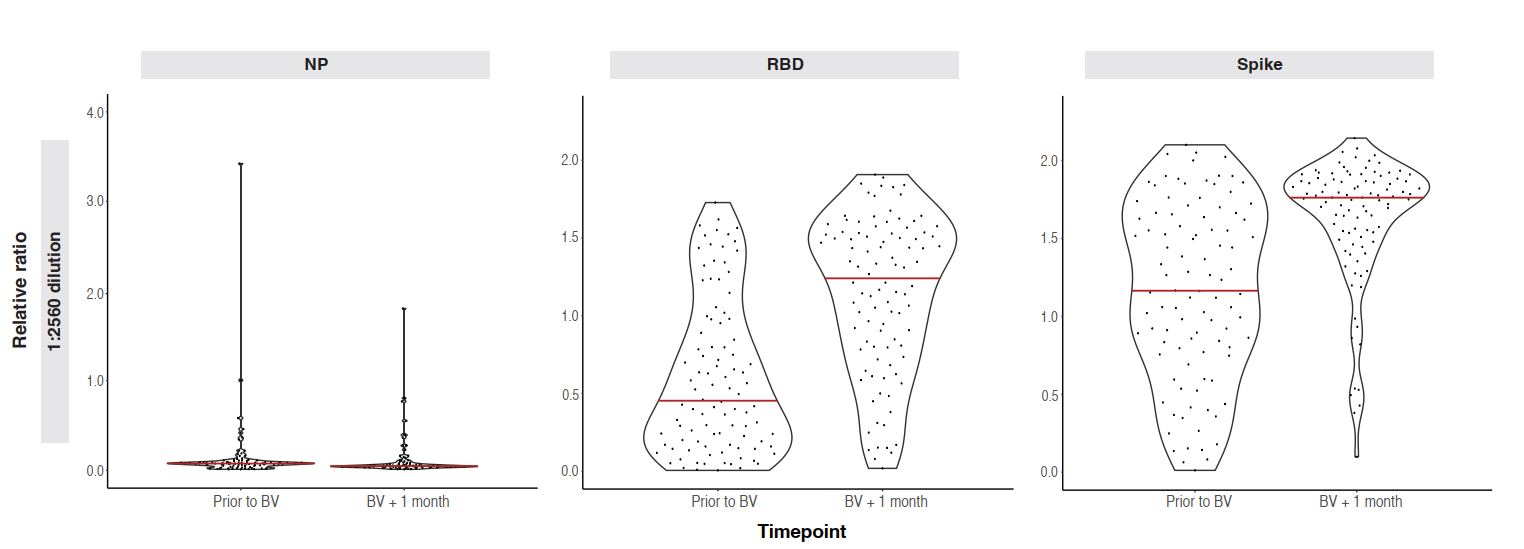


**Extended Data Fig 4 | SARS-CoV-2 IgG nucleocapsid, RBD and Spike Binding Antibody Response.** Dots represent individual serum samples collected (n=98 for each timepoint). Solid red line indicates median level. Antibody levels are reported as relative ratios to synthetic standards. Upper limits of the linear range for the relative ratio is 2 for nucleocapsid, 1.2 for RBD and 1.2 for Spike. Abbreviations: BV, bivalent; N, nucleocapsid protein; RBD, receptor binding domain.

# **Extended Data Table 1 | Baseline characteristics by bivalent vaccine type**

|  | **No. (%)** | | |
| --- | --- | --- | --- |
| **Characteristic** | **Total (n=98)** | **mRNA-1273 (BA.1)**  **(n=72)** | **BNT162b2 (BA.4/BA.5)**  **(n=26)** |
| **Demographics** | | | |
| Age, median (IQR), y | 70 (61, 77) | 69 (61, 75) | 70 (62, 78) |
| Sex (Female) | 34 (35) | 21 (29) | 13 (50) |
| Race |  |  |  |
| Asian | 26 (27) | 20 (28 | 6 (23) |
| Black | 7 (7) | 6 (8) | 1 (4) |
| Caucasian | 38 (39) | 33 (46) | 5 (19) |
| Other/unknown | 27 (28) | 13 (18) | 14 (54) |
| Patient type |  |  |  |
| Dialysis | 83 (85) | 57 (79) | 26 (100) |
| Kidney transplant | 15 (15) | 15 (21) | 0 (0) |
| Cause of chronic kidney disease |  |  |  |
| Diabetes | 29 (30) | 22 (31) | 7 (27) |
| Glomerulonephritis | 21 (21) | 13 (18) | 8 (31) |
| Hypertension | 15 (15) | 11 (15) | 4 (15) |
| Other | 33 (33) | 26 (36) | 7 (27) |
| Prior COVID-19 (RT-PCR or RAT) | 25 (26) | 19 (26) | 6 (23) |
| **Vaccine Type** | | | |
| **Dose 1** |  |  |  |
| ChAdOx1 | 3 (3.1) | 2 (2.8) | 1 (3.8) |
| mRNA-1273 | 36 (37) | 35 (49) | 1 (3.8) |
| BNT162b2 | 59 (60) | 35 (49) | 24 (92) |
| **Dose 2** |  |  |  |
| ChAdOx1 | 3 (3.1) | 2 (2.8) | 1 (3.8) |
| mRNA-1273 | 40 (41) | 39 (54) | 1 (3.8) |
| BNT162b2 | 55 (56) | 31 (43) | 24 (92) |
| **Dose 3** |  |  |  |
| mRNA-1273 | 56 (57) | 45 (62) | 11 (42) |
| BNT162b2 | 42 (43) | 27 (38) | 15 (58) |
| **Dose 4** |  |  |  |
| mRNA-1273 | 65 (66) | 56 (78) | 9 (35) |
| BNT162b2 | 26 (27) | 10 (14) | 16 (62) |
| mRNA-1273 Bivalent (BA.1) | 6 (6.1) | 6 (8.3) | 0 (0) |
| BNT162b2 Bivalent (BA.4/BA.5) | 1 (1.0) | 0 (0) | 1 (3.8) |
| **Dose 5** |  |  |  |
| mRNA-1273 Bivalent (BA.1) | 66 (73) | 66 (100) | 0 (0) |
| BNT162b2 Bivalent (BA.4/BA.5) | 24 (27) | 0 (0) | 24 (100) |
| **Bivalent vaccine dose number** | | | |
| Dose 4 | 8 (8.2) | 3 (4.1) | 5 (20) |
| Dose 5 | 90 (92) | 70 (96) | 20 (80) |
| **Comorbidities** | | | |
| Chronic obstructive pulmonary disease | 8 (8.2) | 5 (6.9) | 3 (12) |
| Coronary artery disease | 14 (14) | 7 (9.7) | 7 (27) |
| Congestive heart failure | 15 (15) | 10 (14) | 5 (19) |
| Cerebrovascular disease | 10 (10) | 7 (9.7) | 3 (12) |
| Hypertension | 80 (82) | 55 (76) | 25 (96) |
| Malignancy | 9 (9.7) | 7 (9.7) | 2 (9.5) |
| Peripheral vascular disease | 8 (8.2) | 6 (8.3) | 2 (7.7) |
| **Immunosuppression** | 17 (17) | 16 (22) | 1 (3.8) |
| Prednisone | 16 (16) | 15 (100) | 1 (100) |
| Mycophenolic acid | 12 (12) | 12 (100) | 0 (0) |
| Calcineurin inhibitor | 16 (16) | 16 (100) | 0 (0) |

# **Extended Data Table 2 | Neutralizing and total antibody levels in overall cohort prior to and following bivalent vaccination**

| **Variable** | **Pre-Bivalent**  **(n= 98)*** | **Post-Bivalent**  **(n= 98)** | **Overall**  **(n= 196)** |
| --- | --- | --- | --- |
| **Wild-type neutralization** | 93 (95%) | 97 (99%) | 190 (97%) |
| **Wild-type log10 ID50** | 3·59 (2·99, 4·15) | 4·25 (3·81, 4·54) | 3·93 (3·37, 4·42) |
| **BA.1 neutralization** | 74 (76%) | 91 (93%) | 165 (84%) |
| **BA.1 log10 ID50** | 2·37 (1·69, 3·35) | 3·59 (2·92, 3·98) | 3·23 (2·19, 3·76) |
| **BA.5 neutralization** | 73 (74%) | 94 (96%) | 167 (85%) |
| **BA.5 log10 ID50** | 2·61 (0·41, 3·20) | 3·53 (3·00, 3·92) | 3·13 (2·09, 3·70) |
| **BQ.1.1 neutralization** | 54 (55%) | 82 (84%) | 136 (69%) |
| **BQ.1.1 log10 ID50** | 1·70 (0·00, 2·38) | 2·86 (2·06, 3·23) | 2·23 (0·00, 2·98) |
| **XBB.1.5 neutralization** | 47 (48%) | 79 (81%) | 126 (64%) |
| **XBB.1.5 log10ID50** | 0·00 (0·00, 2·45) | 2·83 (2·05, 3·24) | 2·28 (0·00, 3·02) |
| **Anti-RBD IgG, relative ratio** | 0·45 (0·18, 0·97) | | 1·24 (0·80, 1·53) |  | | --- | --- | | 0·84 (0·33, 1·44) |
| **Anti-Spike IgG, relative ratio** | 1·16 (0·77, 1·65) | 1·76 (1·52, 1·86) | 1·56 (1·01, 1·81) |
| **Anti-N positive** | 40 (41%) | 36 (37%) | 76 (39%) |
| *Median (IQR); n (%) | | | |

Abbreviations: Anti-N, anti-nucleocapsid, anti-RBD, anti-receptor binding domain; Relative ratios above 1·2 may be underestimated due to assay saturation.

# **Extended Data Table 3 | Fold decrease in neutralization in comparison to wild-type (D614G)**

|  | **Pre-Bivalent**  **mRNA-1273 (n=72)** | **Post Bivalent**  **mRNA-1273  (n=72)** | **Pre-Bivalent**  **BNT162b2 (n=26)** | **Post Bivalent**  **BNT162b2**  **(n=26)** | **Total**  **(n=196)** |
| --- | --- | --- | --- | --- | --- |
| **Median BA.1 Fold Decrease [IQR]*** | 12.2 (60.4) | 5.58 (9.3) | 7.2(31.7) | 3.74 (5.1) | 7.3 (17.5) |
| **Median BA.5 Fold Decrease [IQR]** | 12.8 (37.9) | 7.6 (12.4) | 9.1 (99.1) | 3.1 (5.1) | 8.3 (19.2) |
| **Median BQ.1.1 Fold Decrease [IQR]** | 85.4 (436.4) | 39.0 (92.1) | 45.5 (510.4) | 17.6 (25.5) | 45.8 (170.3) |
| **Median XBB.1.5. Fold Decrease [IQR]** | 108.3 (1282.7) | 42.3 (60.5) | 74.5 (1140.6) | 18.7 (25.9) | 48.2 (376.7) |

* Fold changes are expressed in comparison to wild-type (D614G) ancestral SARS-CoV-2.

# **Extended Data Table 4 | Neutralizing antibody capacity against wild-type, B.1.1.529 Omicron subvariants following bivalent mRNA COVID-19 vaccination by bivalent vaccine type**

| **Variable** | **Overall**  **(n = 98)*** | **mRNA-1273**  **(n= 72)*** | **BNT162b2**  **(n= 26)*** |
| --- | --- | --- | --- |
| **Wild-type neutralization** | 97 (99%) | 71 (99%) | 26 (100%) |
| **Wild-type log10 ID50** | 4.25 (3.81, 4.54) | 4.25 (3.81, 4.56) | 4.22 (3.85, 4.43) |
| **BA.1 neutralization** | 91 (93%) | 66 (92%) | 25 (96%) |
| **BA.1 log10 ID50** | 3.59 (2.92, 3.98) | 3.54 (2.78, 3.93) | 3.73 (3.13, 4.16) |
| **BA.5 neutralization** | 94 (96%) | 69 (96%) | 25 (96%) |
| **BA.5 log10 ID50** | 3.53 (3.00, 3.92) | 3.48 (2.72, 3.73) | 3.80 (3.35, 4.08) |
| **BQ.1.1 neutralization** | 82 (84%) | 59 (82%) | 23 (88%) |
| **BQ.1.1 log10 ID50** | 2.86 (2.06, 3.23) | 2.71 (1.99, 3.12) | 3.16 (2.62, 3.41) |
| **XBB.1.5 neutralization** | 79 (81%) | 57 (79%) | 22 (85%) |
| **XBB.1.5 log10ID50** | 2.83 (2.05, 3.24) | 2.69 (1.93, 3.13) | 3.16 (2.52, 3.49) |
| **COVID-19 vaccine dose number** |  |  |  |
| 4 | 8 (8.2%) | 6 (8.3%) | 2 (7.7%) |
| 5 | 90 (92%) | 66 (92%) | 24 (92%) |
| **Prior COVID-19** | 25 (26%) | 19 (26%) | 6 (23%) |
| * n (%); Median (IQR) | | | |

# **Extended Data Table 5 | Neutralizing antibody capacity against wild-type, B.1.1.529 Omicron subvariants following bivalent mRNA COVID-19 vaccination by number of total vaccine doses**

| **Variable** | **Overall**  **(n= 98)*** | **Four Doses**  **(n=8)*** | **Five Doses**  **(n=90)*** |
| --- | --- | --- | --- |
| **Wild-type neutralization** | 97 (99%) | 8 (100%) | 89 (99%) |
| **Wild-type log10 ID50** | 4.25 (3.81, 4.54) | 4.19 (3.94, 4.26) | 4.28 (3.81, 4.55) |
| **BA.1 neutralization** | 91 (93%) | 8 (100%) | 83 (92%) |
| **BA.1 log10 ID50** | 3.59 (2.92, 3.98) | 3.74 (3.40, 4.16) | 3.59 (2.89, 3.97) |
| **BA.5 neutralization** | 94 (96%) | 8 (100%) | 86 (96%) |
| **BA.5 log10 ID50** | 3.53 (3.00, 3.92) | 3.60 (3.34, 4.08) | 3.53 (2.94, 3.90) |
| **BQ.1.1 neutralization** | 82 (84%) | 7 (88%) | 75 (83%) |
| **BQ.1.1 log10 ID50** | 2.86 (2.06, 3.23) | 2.93 (2.72, 3.33) | 2.82 (2.02, 3.21) |
| **XBB.1.5 neutralization** | 79 (81%) | 7 (88%) | 72 (80%) |
| **XBB.1.5 log10ID50** | 2.83 (2.05, 3.24) | 2.72 (2.57, 3.32) | 2.84 (1.97, 3.23) |
| **Bivalent Vaccine Type** |  |  |  |
| mRNA-1273 | 72 (73%) | 6 (75%) | 66 (73%) |
| BNT162b2 | 26 (27%) | 2 (25%) | 24 (27%) |
| **Patient Type** |  |  |  |
| HD | 83 (85%) | 8 (100%) | 75 (83%) |
| Kidney Transplant | 15 (15%) | 0 (0%) | 15 (17%) |
| **Prior COVID-19** | 25 (26%) | 5 (62%) | 20 (22%) |
| * n (%); Median (IQR) | | | |

Abbreviations: HD, hemodialysis.

# **Extended Data Table 6 | Neutralizing antibody capacity against wild-type, B.1.1.529 Omicron subvariants following bivalent mRNA COVID-19 vaccination by COVID-19 status**

| **Variable** | **Overall**  **(n = 98)*** | **No COVID-19**  **(n= 73)*** | **Prior COVID-19**  **(n=25)*** |
| --- | --- | --- | --- |
| **Wild-type neutralization** | 97 (99%) | 73 (100%) | 24 (96%) |
| **Wild-type log10 ID50** | 4.25 (3.81, 4.54) | 4.27 (3.79, 4.59) | 4.22 (3.93, 4.42) |
| **BA.1 neutralization** | 91 (93%) | 67 (92%) | 24 (96%) |
| **BA.1 log10 ID50** | 3.59 (2.92, 3.98) | 3.52 (2.71, 3.93) | 3.82 (3.51, 4.00) |
| **BA.5 neutralization** | 94 (96%) | 69 (95%) | 25 (100%) |
| **BA.5 log10 ID50** | 3.53 (3.00, 3.92) | 3.37 (2.67, 3.88) | 3.70 (3.53, 3.95) |
| **BQ.1.1 neutralization** | 82 (84%) | 58 (79%) | 24 (96%) |
| **BQ.1.1 log10 ID50** | 2.86 (2.06, 3.23) | 2.68 (1.74, 3.18) | 3.03 (2.63, 3.29) |
| **XBB.1.5 neutralization** | 79 (81%) | 56 (77%) | 23 (92%) |
| **XBB.1.5 log10ID50** | 2.83 (2.05, 3.24) | 2.71 (1.65, 3.24) | 3.02 (2.56, 3.30) |
| **Dose Bivalent Vaccine** |  |  |  |
| 4 | 8 (8.2%) | 3 (4.1%) | 5 (20%) |
| 5 | 90 (92%) | 70 (96%) | 20 (80%) |
| **Bivalent Vaccine Type** |  |  |  |
| mRNA-1273 | 72 (73%) | 53 (73%) | 19 (76%) |
| BNT162b2 | 26 (27%) | 20 (27%) | 6 (24%) |
| * n (%); Median (IQR) | | | |

# **Extended Data Table 7 | Neutralizing antibody capacity against wild-type, B.1.1.529 (Omicron subvariants following bivalent mRNA COVID-19 vaccination by patient type**

| **Variable** | **Overall**  **(n= 98)*** | **HD**  **(n= 83)*** | **Kidney Transplant**  **(n=15)*** |
| --- | --- | --- | --- |
| **Wild-type neutralization** | 97 (99%) | 82 (99%) | 15 (100%) |
| **Wild-type log10 ID50** | 4.25 (3.81, 4.54) | 4.27 (3.79, 4.57) | 4.10 (3.84, 4.38) |
| **BA.1 neutralization** | 91 (93%) | 78 (94%) | 13 (87%) |
| **BA.1 log10 ID50** | 3.59 (2.92, 3.98) | 3.65 (3.11, 4.00) | 3.15 (2.44, 3.63) |
| **BA.5 neutralization** | 94 (96%) | 80 (96%) | 14 (93%) |
| **BA.5 log10 ID50** | 3.53 (3.00, 3.92) | 3.59 (3.11, 3.95) | 3.13 (2.61, 3.52) |
| **BQ.1.1 neutralization** | 82 (84%) | 73 (88%) | 9 (60%) |
| **BQ.1.1 log10 ID50** | 2.86 (2.06, 3.23) | 2.91 (2.16, 3.27) | 2.21 (0.00, 2.75) |
| **XBB.1.5 neutralization** | 79 (81%) | 69 (83%) | 10 (67%) |
| **XBB.1.5 log10ID50** | 2.83 (2.05, 3.24) | 2.88 (2.29, 3.28) | 2.06 (0.00, 2.76) |
| **Dose Bivalent Vaccine** |  |  |  |
| 4 | 8 (8.2%) | 8 (9.6%) | 0 (0%) |
| 5 | 90 (92%) | 75 (90%) | 15 (100%) |
| **Bivalent Vaccine Type** |  |  |  |
| mRNA-1273 | 72 (73%) | 57 (69%) | 15 (100%) |
| BNT162b2 | 26 (27%) | 26 (31%) | 0 (0%) |
| **Prior COVID-19** | 25 (26%) | 23 (28%) | 2 (13%) |
| * n (%); Median (IQR) | | | |

Abbreviations: HD, hemodialysis.
